# Supplementary material
Source: MDPI journal article supplement (https://www.mdpi.com/2073-4395/10/3/326)
Supplement: s1 [file s1]

**Table S1.** Box-Behnken design matrix with the values of the six variables for each experiment and measured and predicted responses ( $n = 2$ ).

| Experiment      | % MeOH | Temperature (°C) | Amplitude (%) | Cycle | pH  | Ratio (mL) | mg anthocyanins measured /g Açaí | mg anthocyanins predicted /g Açaí | Relative error of prediction (%) | mg tot.al phenolics measured /g Açaí | mg total phenolics predicted /g Açaí | Relative error of prediction (%) |
|-----------------|--------|------------------|---------------|-------|-----|------------|----------------------------------|-----------------------------------|----------------------------------|--------------------------------------|--------------------------------------|----------------------------------|
| X <sub>1</sub>  | 50     | 40               | 30            | 0.45  | 2   | 10         | 4.19                             | 4.30                              | 2.68                             | 9.57                                 | 9.77                                 | 2.12                             |
| X <sub>2</sub>  | 50     | 40               | 70            | 0.45  | 2   | 10         | 4.42                             | 4.51                              | 1.99                             | 10.49                                | 10.62                                | 1.20                             |
| X <sub>3</sub>  | 50     | 40               | 30            | 0.45  | 7   | 10         | 4.32                             | 4.02                              | 6.95                             | 11.31                                | 11.48                                | 1.55                             |
| X <sub>4</sub>  | 50     | 40               | 70            | 0.45  | 7   | 10         | 4.37                             | 4.31                              | 1.41                             | 10.39                                | 10.67                                | 2.65                             |
| X <sub>5</sub>  | 50     | 40               | 30            | 0.45  | 2   | 20         | 4.25                             | 4.67                              | 9.82                             | 9.05                                 | 9.05                                 | 0.00                             |
| X <sub>6</sub>  | 50     | 40               | 70            | 0.45  | 2   | 20         | 4.19                             | 4.02                              | 3.99                             | 10.36                                | 8.89                                 | 14.22                            |
| X <sub>7</sub>  | 50     | 40               | 30            | 0.45  | 7   | 20         | 3.74                             | 4.02                              | 7.39                             | 9.42                                 | 9.17                                 | 2.64                             |
| X <sub>8</sub>  | 50     | 40               | 70            | 0.45  | 7   | 20         | 4.37                             | 4.27                              | 2.34                             | 9.19                                 | 9.14                                 | 0.54                             |
| X <sub>9</sub>  | 50     | 10               | 50            | 0.2   | 2   | 15         | 3.99                             | 4.50                              | 12.69                            | 7.33                                 | 7.43                                 | 1.35                             |
| X <sub>10</sub> | 50     | 70               | 50            | 0.2   | 2   | 15         | 4.07                             | 4.10                              | 0.82                             | 8.36                                 | 8.82                                 | 5.54                             |
| X <sub>11</sub> | 50     | 10               | 50            | 0.7   | 2   | 15         | 4.34                             | 4.63                              | 6.78                             | 8.59                                 | 8.76                                 | 1.93                             |
| X <sub>12</sub> | 50     | 70               | 50            | 0.7   | 2   | 15         | 4.64                             | 4.46                              | 3.93                             | 10.11                                | 10.25                                | 1.35                             |
| X <sub>13</sub> | 50     | 10               | 50            | 0.2   | 7   | 15         | 3.65                             | 4.03                              | 10.55                            | 7.20                                 | 8.29                                 | 15.17                            |
| X <sub>14</sub> | 50     | 70               | 50            | 0.2   | 7   | 15         | 3.78                             | 4.12                              | 9.00                             | 7.80                                 | 8.57                                 | 9.98                             |
| X <sub>15</sub> | 50     | 10               | 50            | 0.7   | 7   | 15         | 4.27                             | 4.32                              | 1.06                             | 9.32                                 | 10.06                                | 7.99                             |
| X <sub>16</sub> | 50     | 70               | 50            | 0.7   | 7   | 15         | 4.79                             | 4.89                              | 2.14                             | 9.12                                 | 10.06                                | 10.34                            |
| X <sub>17</sub> | 25     | 40               | 30            | 0.2   | 4.5 | 15         | 3.20                             | 3.52                              | 10.08                            | 9.35                                 | 10.16                                | 8.67                             |
| X <sub>18</sub> | 75     | 40               | 30            | 0.2   | 4.5 | 15         | 2.40                             | 2.35                              | 2.02                             | 9.19                                 | 9.34                                 | 1.62                             |
| X <sub>19</sub> | 25     | 40               | 70            | 0.2   | 4.5 | 15         | 2.62                             | 2.76                              | 5.29                             | 7.53                                 | 8.94                                 | 18.68                            |
| X <sub>20</sub> | 75     | 40               | 70            | 0.2   | 4.5 | 15         | 2.43                             | 2.63                              | 8.20                             | 8.69                                 | 9.02                                 | 3.81                             |

| Experiment      | % MeOH | Temperature (°C) | Amplitude (%) | Cycle | pH  | Ratio (mL) | mg anthocyanins measured /g Açaí | mg anthocyanins predicted /g Açaí | Relative error of prediction (%) | mg total phenolics measured /g Açaí | mg total phenolics predicted /g Açaí | Relative error of prediction (%) |
|-----------------|--------|------------------|---------------|-------|-----|------------|----------------------------------|-----------------------------------|----------------------------------|-------------------------------------|--------------------------------------|----------------------------------|
| X <sub>21</sub> | 25     | 40               | 30            | 0.7   | 4.5 | 15         | 3.13                             | 3.54                              | 12.93                            | 9.47                                | 10.87                                | 14.86                            |
| X <sub>22</sub> | 75     | 40               | 30            | 0.7   | 4.5 | 15         | 2.00                             | 2.12                              | 5.87                             | 7.37                                | 7.58                                 | 2.90                             |
| X <sub>23</sub> | 25     | 40               | 70            | 0.7   | 4.5 | 15         | 2.90                             | 2.98                              | 2.78                             | 9.12                                | 10.48                                | 14.88                            |
| X <sub>24</sub> | 75     | 40               | 70            | 0.7   | 4.5 | 15         | 2.58                             | 2.85                              | 10.30                            | 9.70                                | 9.75                                 | 0.51                             |
| X <sub>25</sub> | 50     | 10               | 30            | 0.45  | 4.5 | 10         | 4.46                             | 4.78                              | 7.23                             | 10.30                               | 9.78                                 | 4.98                             |
| X <sub>26</sub> | 50     | 70               | 30            | 0.45  | 4.5 | 10         | 3.96                             | 4.03                              | 1.84                             | 8.43                                | 8.64                                 | 2.55                             |
| X <sub>27</sub> | 50     | 10               | 70            | 0.45  | 4.5 | 10         | 4.39                             | 4.52                              | 3.05                             | 9.52                                | 8.81                                 | 7.48                             |
| X <sub>28</sub> | 50     | 70               | 70            | 0.45  | 4.5 | 10         | 3.72                             | 3.98                              | 6.89                             | 7.00                                | 8.46                                 | 20.80                            |
| X <sub>29</sub> | 50     | 10               | 30            | 0.45  | 4.5 | 20         | 4.03                             | 4.15                              | 2.88                             | 7.00                                | 7.05                                 | 0.68                             |
| X <sub>30</sub> | 50     | 70               | 30            | 0.45  | 4.5 | 20         | 4.42                             | 4.61                              | 4.23                             | 8.86                                | 9.19                                 | 3.74                             |
| X <sub>31</sub> | 50     | 10               | 70            | 0.45  | 4.5 | 20         | 4.18                             | 4.16                              | 0.45                             | 9.62                                | 8.86                                 | 7.92                             |
| X <sub>32</sub> | 50     | 70               | 70            | 0.45  | 4.5 | 20         | 4.30                             | 4.26                              | 0.97                             | 8.54                                | 9.96                                 | 16.66                            |
| X <sub>33</sub> | 25     | 10               | 50            | 0.45  | 2   | 15         | 2.59                             | 2.49                              | 3.79                             | 6.64                                | 6.75                                 | 1.69                             |
| X <sub>34</sub> | 75     | 10               | 50            | 0.45  | 2   | 15         | 2.10                             | 2.05                              | 2.19                             | 7.00                                | 6.93                                 | 1.03                             |
| X <sub>35</sub> | 25     | 70               | 50            | 0.45  | 2   | 15         | 2.53                             | 2.35                              | 7.20                             | 6.95                                | 7.02                                 | 0.97                             |
| X <sub>36</sub> | 75     | 70               | 50            | 0.45  | 2   | 15         | 2.44                             | 2.56                              | 4.71                             | 6.77                                | 6.98                                 | 3.10                             |
| X <sub>37</sub> | 25     | 10               | 50            | 0.45  | 7   | 15         | 2.38                             | 2.43                              | 2.27                             | 5.33                                | 5.53                                 | 3.74                             |
| X <sub>38</sub> | 75     | 10               | 50            | 0.45  | 7   | 15         | 2.37                             | 2.34                              | 1.08                             | 7.42                                | 7.58                                 | 2.21                             |
| X <sub>39</sub> | 25     | 70               | 50            | 0.45  | 7   | 15         | 2.95                             | 2.59                              | 12.18                            | 8.03                                | 8.01                                 | 0.23                             |
| X <sub>40</sub> | 75     | 70               | 50            | 0.45  | 7   | 15         | 2.40                             | 2.43                              | 1.12                             | 8.66                                | 8.23                                 | 4.93                             |
| X <sub>41</sub> | 25     | 40               | 50            | 0.2   | 4.5 | 10         | 2.96                             | 3.12                              | 5.33                             | 7.60                                | 8.01                                 | 5.42                             |

| Experiment      | % MeOH | Temperature (°C) | Amplitude (%) | Cycle | pH  | Ratio (mL) | mg anthocyanins measured /g Açaí | mg anthocyanins predicted /g Açaí | Relative error of prediction (%) | mg total phenolics measured /g Açaí | mg total phenolics predicted /g Açaí | Relative error of prediction (%) |
|-----------------|--------|------------------|---------------|-------|-----|------------|----------------------------------|-----------------------------------|----------------------------------|-------------------------------------|--------------------------------------|----------------------------------|
| X <sub>42</sub> | 75     | 40               | 50            | 0.2   | 4.5 | 10         | 2.52                             | 2.63                              | 4.43                             | 8.41                                | 9.25                                 | 10.00                            |
| X <sub>43</sub> | 25     | 40               | 50            | 0.7   | 4.5 | 10         | 2.72                             | 2.76                              | 1.41                             | 7.53                                | 7.63                                 | 1.31                             |
| X <sub>44</sub> | 75     | 40               | 50            | 0.7   | 4.5 | 10         | 2.84                             | 2.88                              | 1.52                             | 6.95                                | 7.58                                 | 9.03                             |
| X <sub>45</sub> | 25     | 40               | 50            | 0.2   | 4.5 | 20         | 3.59                             | 3.65                              | 1.74                             | 9.00                                | 9.23                                 | 2.50                             |
| X <sub>46</sub> | 75     | 40               | 50            | 0.2   | 4.5 | 20         | 2.45                             | 2.52                              | 3.01                             | 8.91                                | 9.12                                 | 2.41                             |
| X <sub>47</sub> | 25     | 40               | 50            | 0.7   | 4.5 | 20         | 2.65                             | 2.87                              | 8.43                             | 7.55                                | 8.05                                 | 6.65                             |
| X <sub>48</sub> | 75     | 40               | 50            | 0.7   | 4.5 | 20         | 2.33                             | 2.35                              | 0.80                             | 9.52                                | 9.10                                 | 4.39                             |
| R <sub>1</sub>  | 50     | 40               | 50            | 0.45  | 4.5 | 15         | 4.08                             | 4.53                              | 11.04                            | 9.27                                | 10.06                                | 8.57                             |
| R <sub>2</sub>  | 50     | 40               | 50            | 0.45  | 4.5 | 15         | 4.11                             | 4.53                              | 10.15                            | 9.22                                | 10.06                                | 9.15                             |
| R <sub>3</sub>  | 50     | 40               | 50            | 0.45  | 4.5 | 15         | 4.59                             | 4.53                              | 1.28                             | 10.33                               | 10.06                                | 2.56                             |
| R <sub>4</sub>  | 50     | 40               | 50            | 0.45  | 4.5 | 15         | 4.57                             | 4.53                              | 0.97                             | 9.50                                | 10.06                                | 5.92                             |
| R <sub>5</sub>  | 50     | 40               | 50            | 0.45  | 4.5 | 15         | 4.61                             | 4.53                              | 1.69                             | 9.17                                | 10.06                                | 9.75                             |
| R <sub>6</sub>  | 50     | 40               | 50            | 0.45  | 4.5 | 15         | 4.84                             | 4.53                              | 6.42                             | 9.34                                | 10.06                                | 7.80                             |
